# Supplementary material for: New insights on the dynamics of the γ-Fe/α-Fe phase-transition inside iron-filled carbon nanotubes
Source: Royal Society of Chemistry journal article supplement (doi:10.1039/c7ra03144k), 2017-01-01
Supplement: c7ra03144k1.pdf [file c7ra03144k1.pdf]

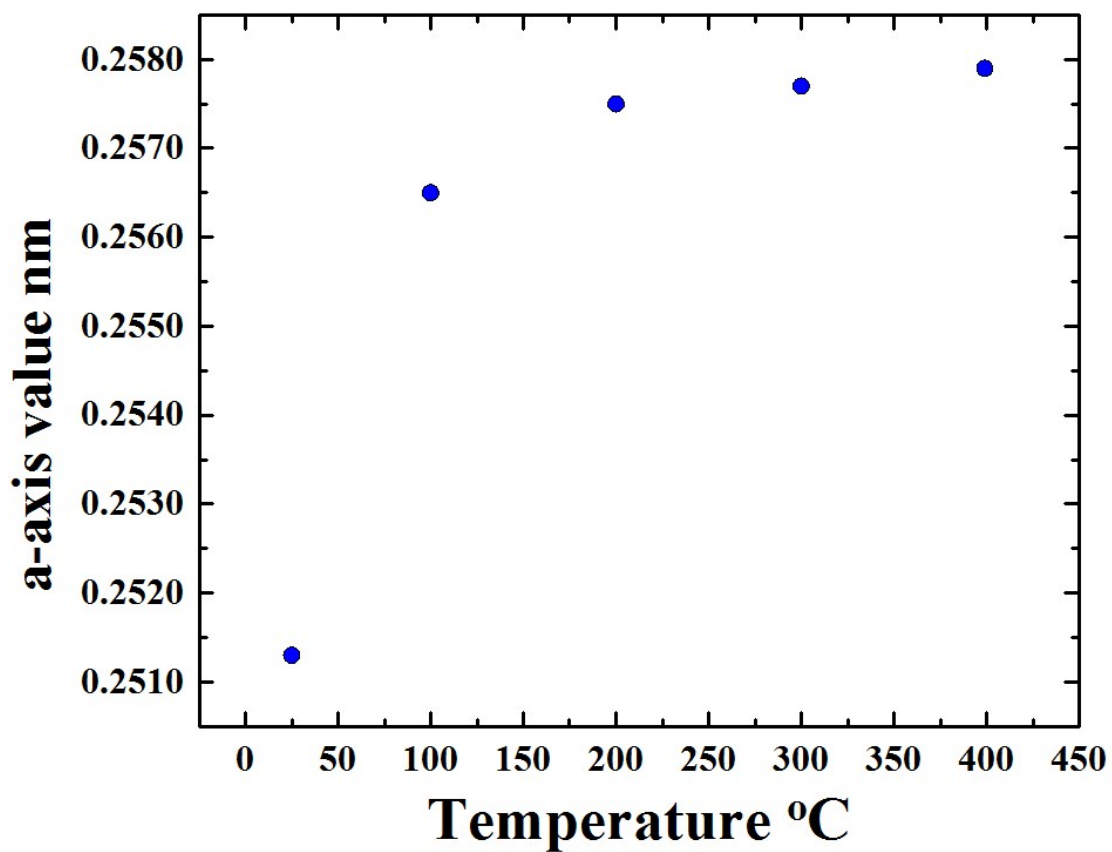

Figure 1 Supp.: Plot showing the T-dependence variation of the a-axis of the graphitic CNT unit cell.

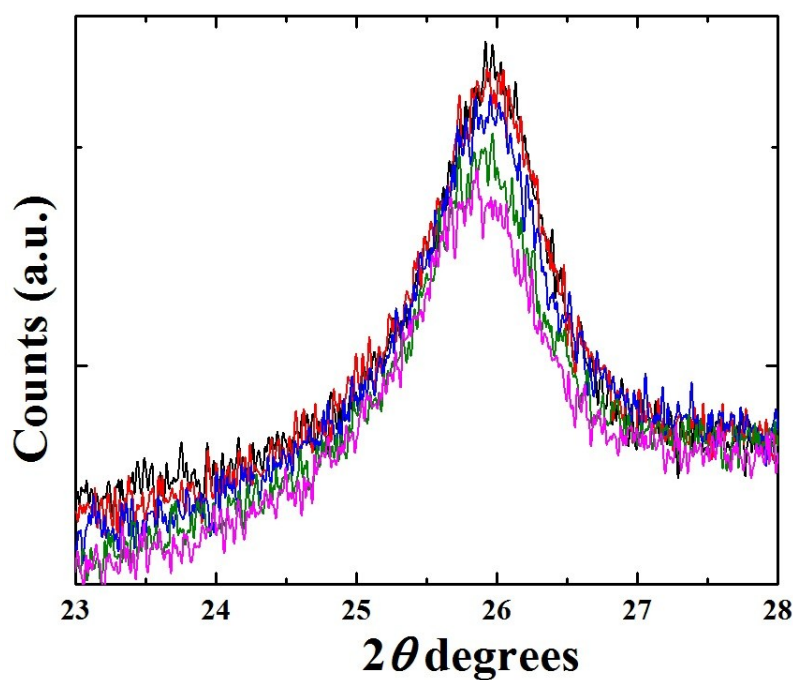

Figure 2 Supp.: Plot showing the T-dependence variation of the 002 graphitic CNT reflection.

Note that a slight decrease of the 002 reflection-intensity is observed. Such observation may imply that CNT walls can be slowly consumed by the heating-process also in vacuum.

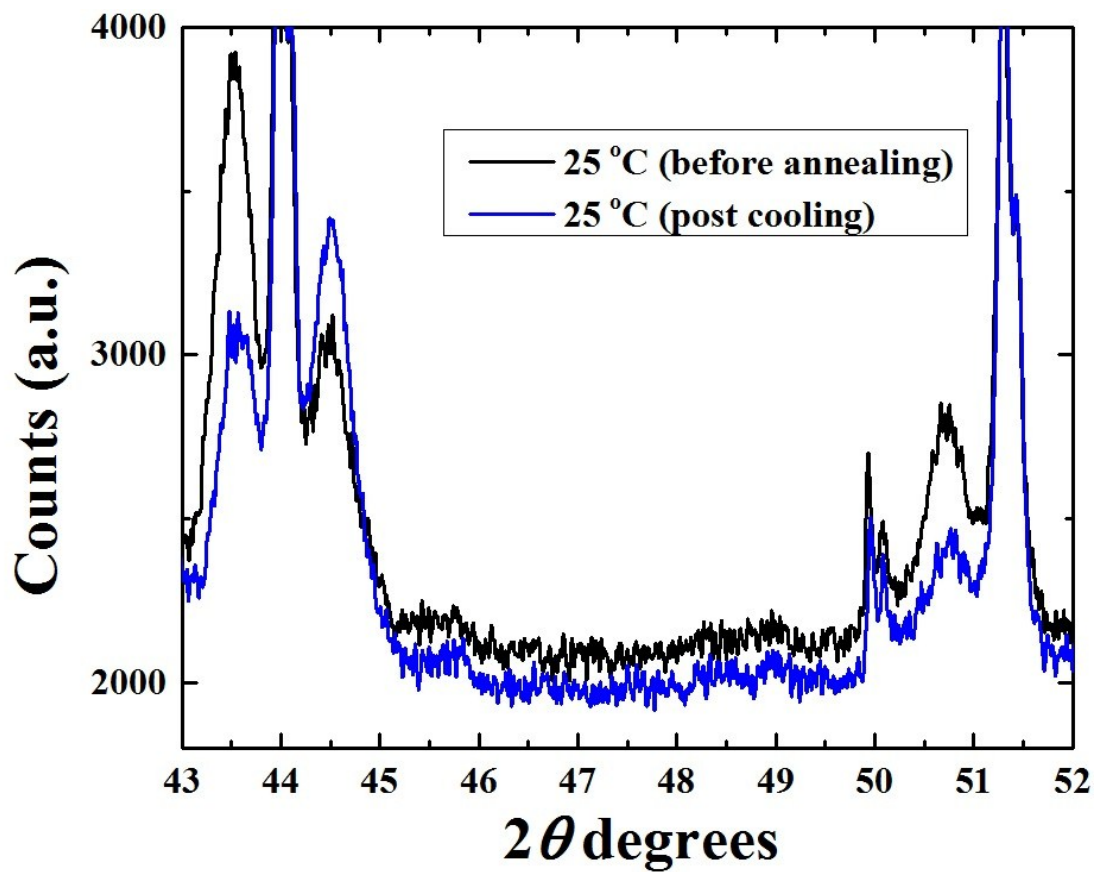

Figure 3 Supp.: Plot showing the variation in the  $\gamma$ -Fe and  $\alpha$ -Fe intensities before the annealing treatment in vacuum and after annealing (after cooling down the sample with liquid nitrogen).

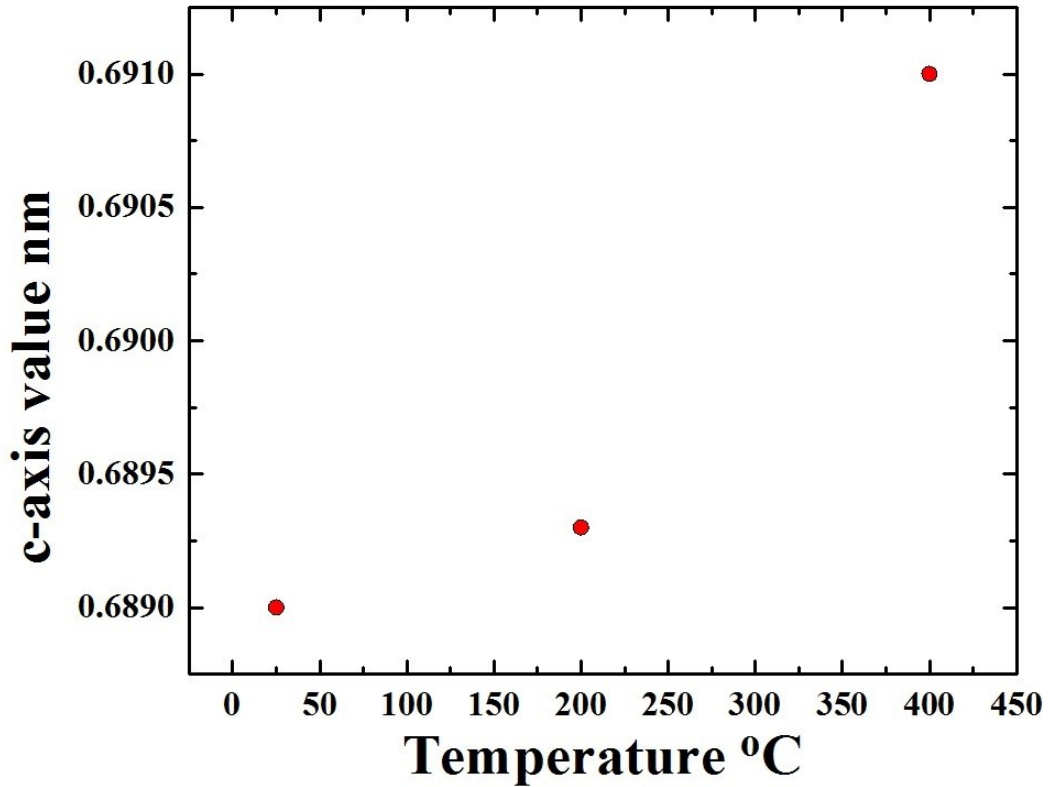

Figure 4 Supp: Plot showing the T-dependence variation of the c-axis of the graphitic CNT unit cell for the case of hollow CNTs.

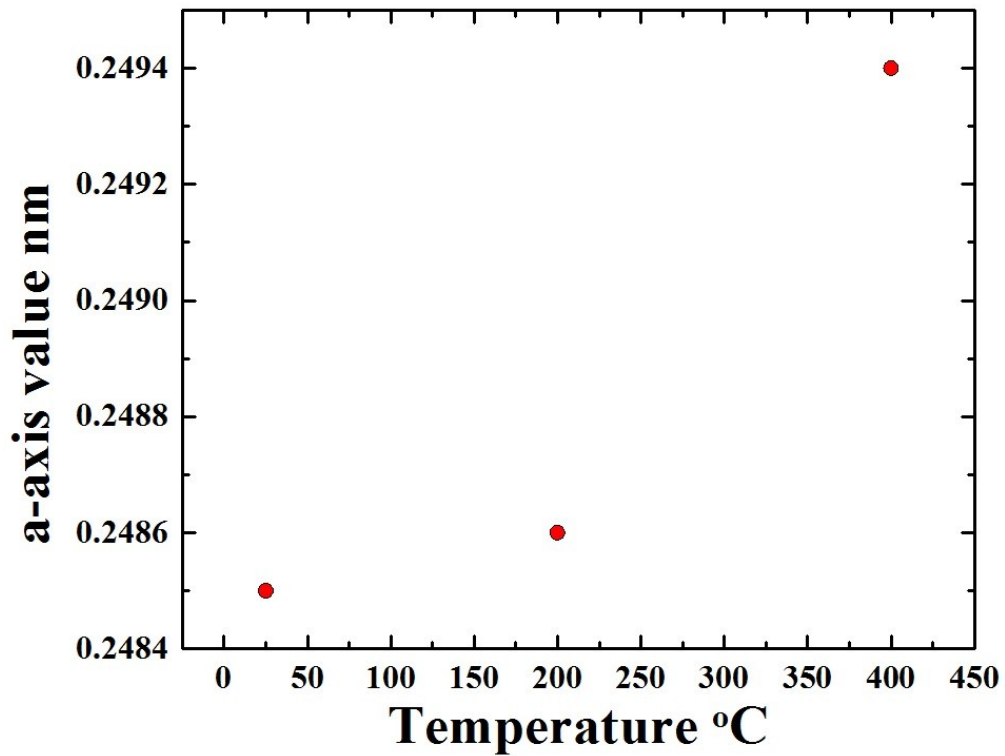

Figure 5 Supp: Plot showing the T-dependence variation of the a-axis of the graphitic CNT unit cell for the case of hollow CNTs.

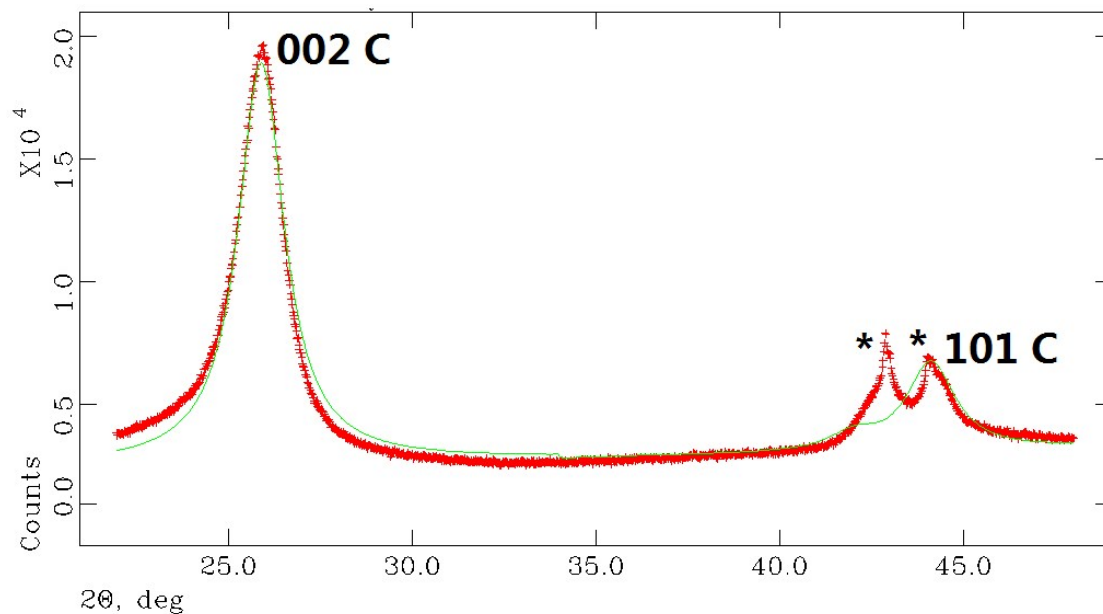

Figure 6 Supp: XRD diffractogram (red line) and Rietveld refinement (green line) of the sample comprising hollow CNTs measured at the temperature of 25 °C. Note that the black stars indicate the peaks arising from the substrate used for the measurement.

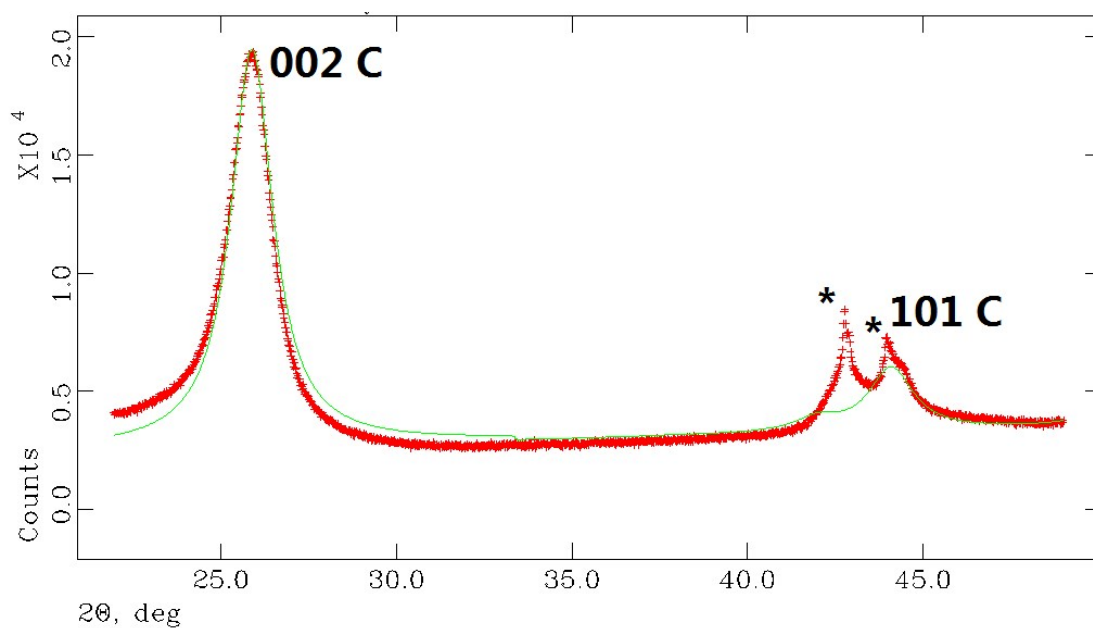

Figure 7 Supp: XRD diffractogram (red line) and Rietveld refinement (green line) of the sample comprising hollow CNTs measured at the temperature of 200 °C. Note that the black stars indicate the peaks arising from the substrate used for the measurement.

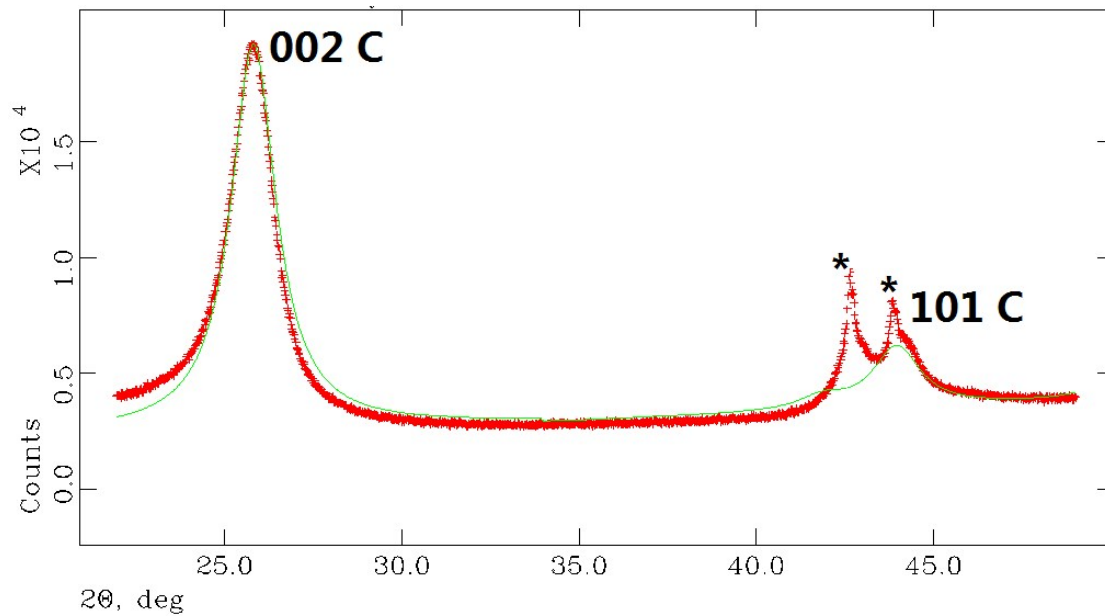

Figure 8 Supp: XRD diffractogram (red line) and Rietveld refinement (green line) of the sample comprising hollow CNTs measured at the temperature of 400 °C. Note that the black stars indicate the peaks arising from the substrate used for the measurement.

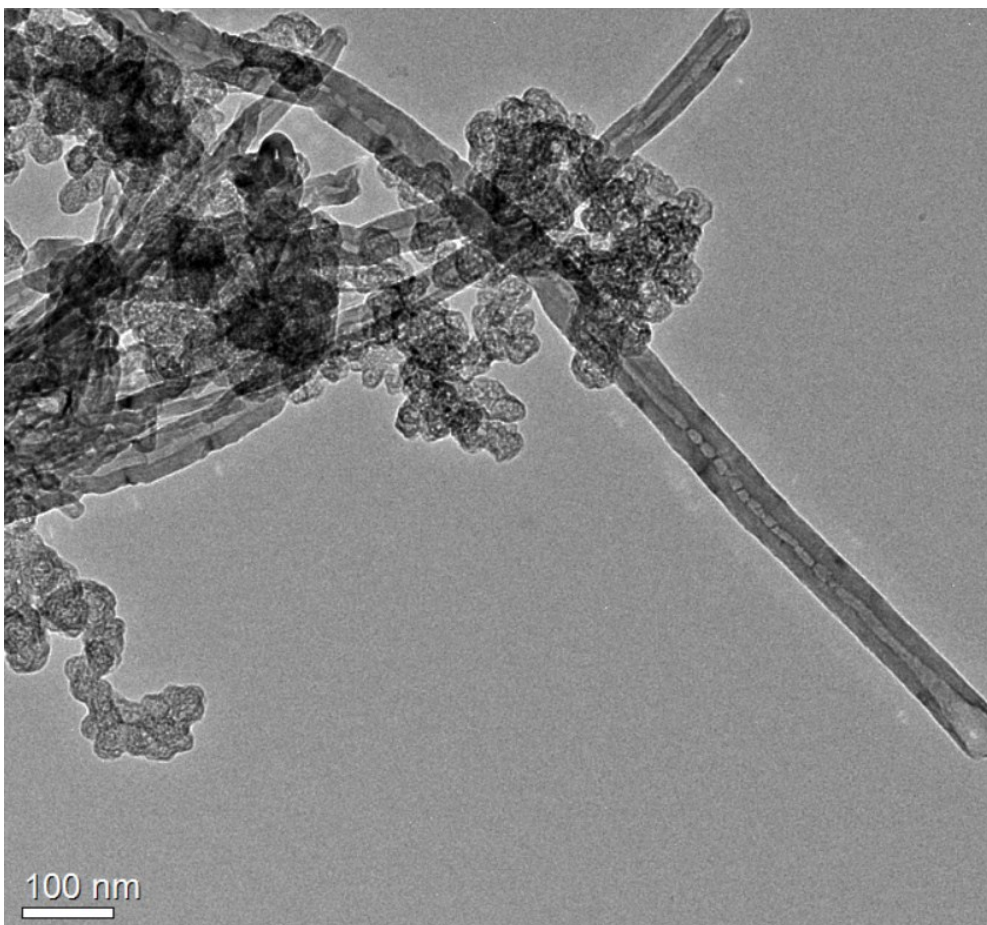

Figure 9 Supp: typical TEM micrograph showing the cross-sectional morphology of the hollow CNTs used for the second set of Temperature dependent XRD measurements in vacuum. This type of sample appears to contain also amorphous-like impurities (together with hollow CNTs).
